# Supplementary material for: Characterization of Rare Himalayan Balsam (Impatiens glandulifera Royle) Honey from Croatia
Source: MDPI journal article supplement (doi:10.3390/foods11193025), 2022-09-29
Supplement: s1 [file s1]

Table S1. Detailed insight into pollen spectrum of Himalayan balsam honey samples (n=10; HBH1–HBH10) with regard to predominant (>45%), secondary (16%–45%), important minor (3%–15%), and minor (<3%) pollen of determined plant taxa

| Sample | Predominant pollen (>45%)  | Secondary pollen (16-45%) | Important minor pollen (3-15%)                                                                                                                   | Minor Pollen (<3%)                                                                                                                                                                                                                                               |
|--------|----------------------------|---------------------------|--------------------------------------------------------------------------------------------------------------------------------------------------|------------------------------------------------------------------------------------------------------------------------------------------------------------------------------------------------------------------------------------------------------------------|
| HBH 1  | <i>I. glandulifera</i> 75% | -                         | Fabaceae 6%, Brassicaceae 6%,<br><i>Salix</i> spp. 4%                                                                                            | <i>Frangula alnus</i> 2%, <i>Tilia</i> spp. 2%,<br>Asteraceae ( <i>Solidago</i> form) 1%,<br>Asteraceae ( <i>Helinathus</i> form) 1%                                                                                                                             |
| HBH 2  | <i>I. glandulifera</i> 61% | <i>Solidago</i> spp. 27%  | Fabaceae 6%, <i>Fagopyrum esculentum</i> 4%                                                                                                      | <i>Hedera helix</i> 1%, undetermined 1%                                                                                                                                                                                                                          |
| HBH 3  | <i>I. glandulifera</i> 64% | -                         | <i>Solidago</i> spp. 15%, Fabaceae 9%,<br>Brassicaceae 9%, undetermined 4%                                                                       | <i>Fagopyrum esculentum</i> 2%                                                                                                                                                                                                                                   |
| HBH 4  | <i>I. glandulifera</i> 66% | Brassicaceae 21%          | Asteraceae ( <i>Solidago</i> form) 4%,<br><i>Prunus</i> spp. 3%                                                                                  | undetermined 2%, Fabaceae 1%,<br>Asteraceae ( <i>Helinathus</i> form) 1%,<br><i>Salix</i> spp. 1%, <i>Frangula alnus</i> 1%                                                                                                                                      |
| HBH 5  | <i>I. glandulifera</i> 83% | -                         | <i>Solidago</i> spp. 8%                                                                                                                          | Asteraceae ( <i>Helinathus</i> form) 2%,<br>Brassicaceae 2%, undetermined 2%,<br>Apiaceae 1%, Rosaceae 1%,<br>Fabaceae 1%                                                                                                                                        |
| HBH 6  | <i>I. glandulifera</i> 59% | Fabaceae 16%              | undetermined 5%, Brassicaceae 4%,<br><i>Frangula alnus</i> 4%, Asteraceae 4%,<br><i>Fagopyrum esculentum</i> 4%,<br><i>Trifolium pratense</i> 4% | -                                                                                                                                                                                                                                                                |
| HBH 7  | <i>I. glandulifera</i> 80% | -                         | Brassicaceae 5%, <i>Solidago</i> spp. 5%,<br>undetermined 4%                                                                                     | Rosaceae 2%, Fabaceae 2%, <i>Salix</i> spp. 1%,<br>Asteraceae ( <i>Helinathus</i> form) 1%                                                                                                                                                                       |
| HBH 8  | <i>I. glandulifera</i> 62% | -                         | Brassicaceae 12%, <i>Solidago</i> spp. 7%,<br>undetermined 4%, Rosaceae 3%                                                                       | Asteraceae ( <i>Helinathus</i> form) 2%,<br><i>Salix</i> spp. 2%, Fabaceae 2%,<br>Asteraceae ( <i>Taraxacum</i> form) 1%,<br>Asteraceae ( <i>Achilea</i> form) 1%,<br><i>Centaurea</i> spp. 1%, <i>Galium</i> spp. 1%,<br>Lamiaceae 1%, <i>Viola tricolor</i> 1% |
| HBH 9  | <i>I. glandulifera</i> 75% | -                         | <i>Castanea sativa</i> 9%, <i>Solidago</i> spp. 7%,<br>Brassicaceae 3%                                                                           | <i>Fagopyrum esculentum</i> 2%,<br>undetermined 1%, <i>Trifolium</i> spp. 1%                                                                                                                                                                                     |
| HBH 10 | <i>I. glandulifera</i> 85% | -                         | <i>Solidago</i> spp. 4%, <i>Frangula alnus</i> 3%                                                                                                | Asteraceae ( <i>Helinathus</i> form) 1%,<br>Asteraceae ( <i>Taraxacum</i> form) 1%                                                                                                                                                                               |
|        |                            |                           |                                                                                                                                                  | Asteraceae ( <i>Helinathus</i> form) 2%,<br>undetermined 2%, Brassicaceae 2%,<br><i>Fagopyrum esculentum</i> 1%,<br><i>Viola tricolor</i> 1%                                                                                                                     |
